# Supplementary material for: One-pot production of a sea urchin-like alloy electrocatalyst for the oxygen electro-reduction reaction
Source: Royal Society of Chemistry journal article supplement (doi:10.1039/d2dt01268e), 2022-01-01
Supplement: d2dt01268e1.pdf [file d2dt01268e1.pdf]

## Supporting Information

# One-pot Production of Sea Urchin-Like Alloy Electrocatalyst for Oxygen Electro-Reduction Reaction

*Hau Quoc Pham,<sup>1,2</sup> and Tai Thien Huynh<sup>3,\*</sup>*

<sup>1</sup>Future Materials & Devices Lab., Institute of Fundamental and Applied Sciences, Duy Tan University, Ho Chi Minh City, 700000, Viet Nam

<sup>2</sup>The Faculty of Environmental and Chemical Engineering, Duy Tan University, Da Nang, 550000, Viet Nam

<sup>3</sup>Ho Chi Minh City University of Natural Resources and Environment (HCMUNRE), Ho Chi Minh City, 700000, Viet Nam

\*Corresponding author. E-mail: [httai@hcmunre.edu.vn](mailto:httai@hcmunre.edu.vn)

## EXPERIMENTAL DETAILS

### Chemical reagents

All reagents were commercially purchased and used without further purification. Hexachloroplatinic acid ( $\text{H}_2\text{PtCl}_6 \cdot x\text{H}_2\text{O}$ ; ~38% Pt), nickel(II) chloride hexahydrate ( $\text{NiCl}_2 \cdot 6\text{H}_2\text{O}$ ; 99.9% trace metal basis), and Nafion 117 solution (5 wt%) were purchased from Sigma-Aldrich, USA. Polyvinylpyrrolidone (PVP, MW = 40 000) and L-ascorbic acid ( $\geq 99.7\%$ ) were obtained from HiMedia Lab., India, and Beijing Chemical Reagent, China.

### Material Characterizations

X-ray diffraction (XRD) pattern of as-made catalyst was collected on D2 PHASER (Bruker, Germany) with Cu  $K_\alpha$  radiation source ( $\lambda = 1.5418 \text{ \AA}$ ) in degree range of  $20^\circ$  to  $80^\circ$  at a step size of  $0.02^\circ$ . The morphology and particle size of the as-obtained nanocatalyst were characterized through transmission electron microscopy (TEM) and HR-TEM images on a JOEL-JEM 2100F device at 200 kV. Before the test, a specimen was distributed in ethanol solution to form a homogeneous suspension, followed by casting on carbon film-coated copper microgrids. Also, elemental composition and distribution were recorded by scanning electron microscopy (SEM) with energy dispersive X-ray analysis (EDX) on JOEL-JSM 6500F device at 10 kV. X-ray photoelectron spectroscopy (XPS) was carried out on PHI 5000 VersaProbe (Ulvac-PHI) equipped with a monochromator Al  $K_\alpha$  ( $h\nu = 1486.6 \text{ eV}$ ) X-ray source at a 10 mA current and 15 kV anode voltage.

### Electrochemical Properties

Electrochemical measurements were conducted on an Autolab potentiostat/galvanostat (PGSTAT302N) workstation (Metrohm Co., Ltd. Switzerland) connected with a three-electrode cell, including a working electrode (glassy carbon (GCE), 5 mm), a counter electrode (platinum wire), and reference electrode (Ag/AgCl/(sat.KCl)). For catalyst ink preparation, 1.7 mg of as-made catalyst was dispersed in a mixture of 20  $\mu\text{L}$  of Nafion and

180  $\mu\text{L}$  of ethanol absolute, followed by the ultrasonication of 30 min to form a homogeneous ink. Before coating the as-prepared catalyst ink, the surface of the working electrode was polished by 0.5  $\mu\text{m}$   $\text{Al}_2\text{O}_3$  and washed by absolute ethanol and purged water, and then 2.5  $\mu\text{L}$  of catalyst ink was drop-cast onto the GCE surface and dried naturally. To start with, a cyclic voltammetry test was performed in an  $\text{N}_2$ -saturated 0.5 M  $\text{H}_2\text{SO}_4$  electrolyte solution with 100 cycles at 50  $\text{mV s}^{-1}$  to get an active working electrode. The electrochemical surface area (ECSA) of the as-made catalyst was calculated from the hydrogen adsorption/desorption region in cyclic voltammetry (CV) in  $\text{N}_2$ -saturated 0.5 M  $\text{H}_2\text{SO}_4$  aqueous electrolyte at 25  $\text{mV s}^{-1}$  scan rate. To investigate the ORR performance, linear sweep voltammetry (LSV) test was carried out using a rotating disk electrode (Autolab RDE) at 1600 rpm in an  $\text{O}_2$ -saturated 0.5 M  $\text{H}_2\text{SO}_4$  electrolyte solution at a scan rate of 10  $\text{mV s}^{-1}$ . Electrochemical impedance spectroscopy (EIS) was recorded in a frequency range of 0.1 -  $10^5$  Hz at 0.9  $V_{\text{RHE}}$  in an  $\text{O}_2$ -saturated 0.5 M  $\text{H}_2\text{SO}_4$  electrolyte solution. In terms of electrocatalytic stability, an accelerated durability test (ADT) with 5000-cycling was conducted in  $\text{N}_2$ - and  $\text{O}_2$ -saturated 0.5 M  $\text{H}_2\text{SO}_4$  electrolyte solution. For comparison, 20 wt% Pt NPs/C (E-TEK) catalyst was used as a benchmark catalyst. All reported potentials were converted from Ag/AgCl to reversible hydrogen electrode (RHE) scale by Eqs. (1)-(3):<sup>1</sup>

$$E_{\text{RHE}} = E_{\text{Mea}} + 0.059 \cdot \text{pH} + E_{\text{Ag/AgCl}}^0 \quad (1)$$

$$E_{\text{RHE}} = E_{\text{Mea}} + 0.059 \cdot 0 + 0.197 \quad (2)$$

$$E_{\text{RHE}} = E_{\text{Mea}} + 0.197 \quad (3)$$

where  $E_{\text{RHE}}$  is a potential versus RHE,  $E_{\text{Mea}}$  is a measured potential,  $E_{\text{Ag/AgCl}}^0$  is a standard electrode potential of Ag/AgCl/(sat.KCl), and pH of 0.5 M  $\text{H}_2\text{SO}_4$  is close to 0.

#### ***Calculation of lattice parameters of as-made NiPt NUCs/C catalyst***

The interplanar spacing ( $d_{(hkl)}$ ) was calculated by Bragg's law (Eq. (4))<sup>2, 3</sup>:

$$d_{(hkl)} = \frac{\lambda}{2 \sin \theta} \quad (4)$$

where:  $d_{(hkl)}$  is lattice space (Å);  $\lambda$  is the wavelength of the incident X-ray ( $\lambda = 15406$  Å);  $\theta$  is the Bragg angle.

The coherent length ( $D_{(hkl)}$ ) was estimated by Debye-Scherrer's formula (Eq.(5))<sup>2-4</sup>:

$$D_{(hkl)} = \frac{k\lambda}{\beta \cos \theta} \quad (5)$$

where:  $D_{(hkl)}$  is average crystallite size (nm),  $k$  is Scherrer constant (0.94),  $\lambda$  is the wavelength of the incident X-ray ( $\lambda = 15406$  Å),  $\beta$  is the line broadening at half the maximum intensity (FWHM), and  $\theta$  is the Bragg angle.

#### ***Calculation of electrochemical surface area***

Based on hydrogen adsorption/desorption regions in CV curves in  $N_2$ -purged 0.5 M  $H_2SO_4$  electrolyte solution, the electrochemical surface area (ECSA) of as-made NiPt NUCs/C and commercial Pt NPs/C (E-TEK) catalysts was calculated by Eq. (6):<sup>5-7</sup>

$$ECSA = \frac{Q_H}{0.21 * [Metal]} \quad (6)$$

where  $Q_H$  (mC  $cm^{-2}$ ) represents the coulombic charge for hydrogen adsorption; 0.21 (mC  $cm^{-2}$ ) is the charge required to oxidize an  $H_2$  monolayer, and [Metal] is the loaded catalyst metal onto the working surface electrode (0.13 mg  $cm^{-2}$ ).  $Q_H$  can be estimated by Eqs. (7):<sup>8,9</sup>

$$Q_H = \frac{1}{\nu A} \int I_{(v)} dV \quad (7)$$

where  $I$  (A) represents the peak current;  $V$  (V) is the peak potential;  $\nu$  ( $mV s^{-1}$ ) denotes the scanning rate, which is 25  $mV s^{-1}$  in this experiment; and  $A$  ( $cm^2$ ) is the GCE's geometric area, which is 0.1964  $cm^2$ .

#### ***Calculation of ORR kinetics of catalyst***

Based on the rotating disk electrodes (RDE) test, the kinetic current density and number of

transferred electrons during the oxygen electro-reduction process were calculated by Koutecky-Levich (K-L) equation as follows:<sup>10-15</sup>

$$\frac{1}{j} = \frac{1}{j_L} + \frac{1}{j_K} = \frac{1}{B\omega^{1/2}} + \frac{1}{j_K} \quad (8)$$

$$B = 0.201nFC_0D^{2/3}\nu^{-1/6} \quad (9)$$

where  $j$  (mA cm<sup>-2</sup>) is a measured current density,  $j_L$  (mA cm<sup>-2</sup>) and  $j_K$  (mA cm<sup>-2</sup>) are diffusion-limited current density and kinetic current density, respectively.  $B$  (C cm<sup>-2</sup> s<sup>-1/2</sup>) is the Levich constant, which was calculated from slope values of  $1/j$  and  $1/\omega^{1/2}$ ;  $n$  is the transferred electron number during ORR;  $F$  (96485 C mol<sup>-1</sup>) is the Faraday constant;  $C_0$  is the bulk concentration of O<sub>2</sub> (1.17x10<sup>-6</sup> mol cm<sup>-3</sup> in 0.5 M H<sub>2</sub>SO<sub>4</sub>).<sup>16, 17</sup>  $D$  is the diffusion coefficient of O<sub>2</sub> (1.4x10<sup>-5</sup> cm<sup>2</sup> s<sup>-1</sup> in 0.5 M H<sub>2</sub>SO<sub>4</sub>)<sup>16, 17</sup>;  $\nu$  is the kinematic viscosity of electrolyte (0.01 cm<sup>2</sup> s<sup>-1</sup> for 0.5 M H<sub>2</sub>SO<sub>4</sub>);<sup>16, 17</sup> and  $\omega$  (rad s<sup>-1/2</sup>) is electrode angular velocity.

Then, the kinetic current density was calculated following Eq. (10):

$$j_K = \frac{j^* j_L}{j_L - j} \quad (10)$$

The mass activity and specific activity were calculated by following Eq.(11), (12):

$$\text{Mass activity} = \frac{j_K}{[\text{Metal}]} \quad (11)$$

$$\text{Specific activity} = \frac{\text{Mass activity}}{\text{ECSA}} \quad (12)$$

## Results and Discussion

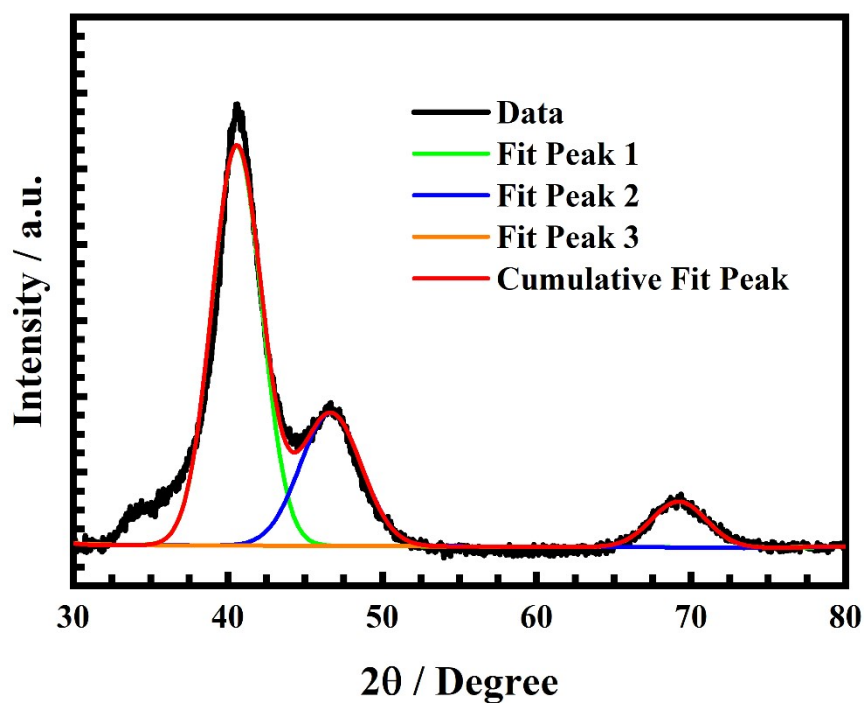

**Figure S1.** Fitted-XRD pattern of as-made NiPt NUCs/C catalyst.

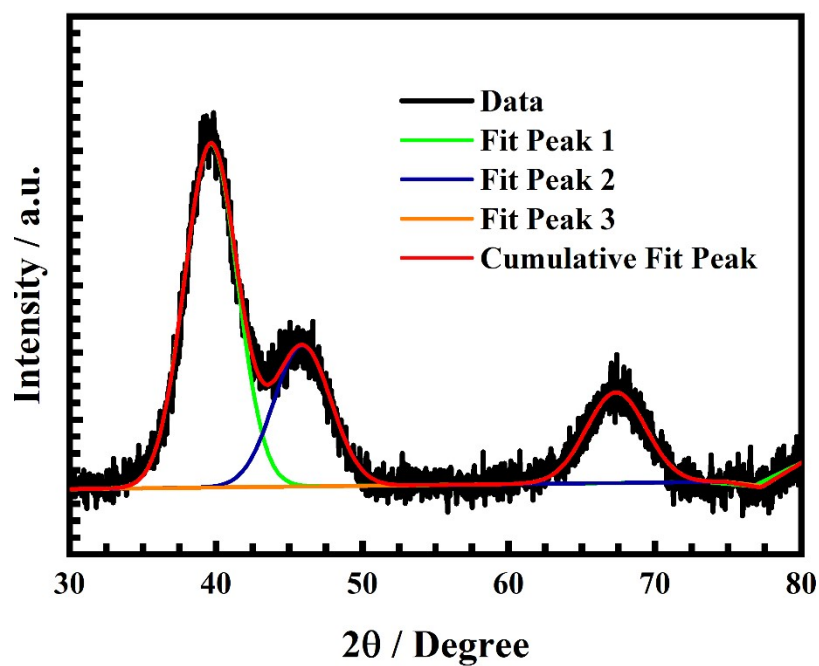

**Figure S2.** Fitted-XRD pattern of commercial Pt NPs/C catalyst.

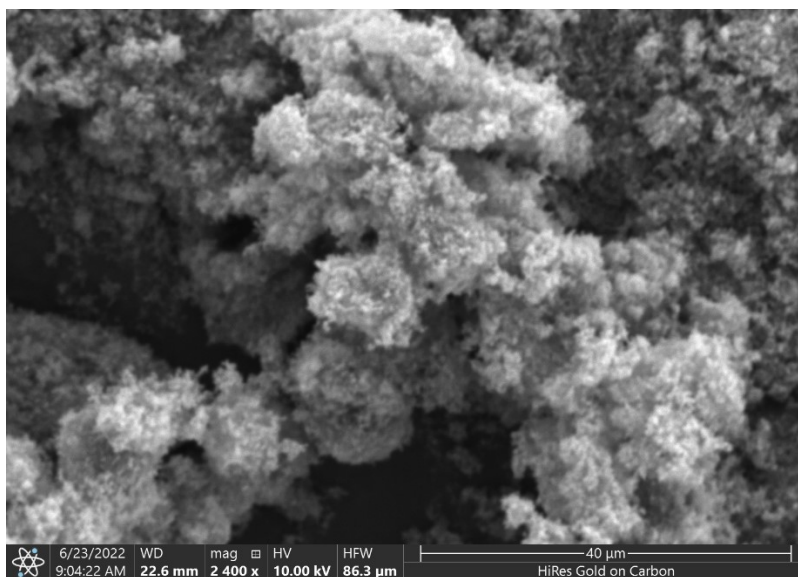

**Figure S3.** SEM image of the as-made NiPt NUCs/C catalyst.

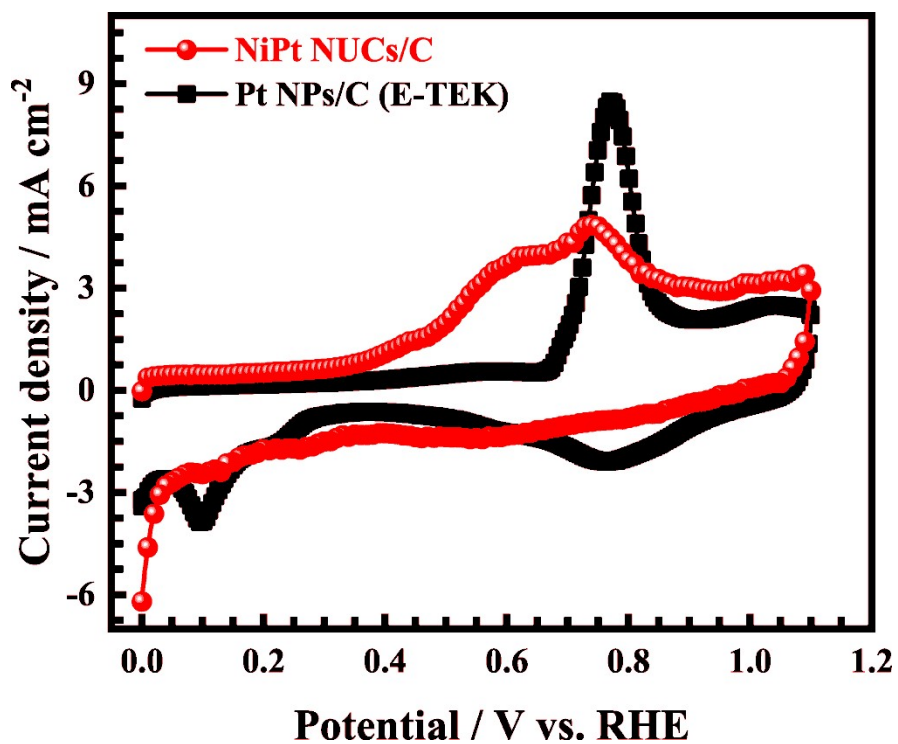

**Figure S4.** CO-stripping curves of as-made NiPt NUCs/C and Pt NPs/C (E-TEK) catalysts in 0.5 M H<sub>2</sub>SO<sub>4</sub> electrolyte solution at a scan rate of 50 mV s<sup>-1</sup>.

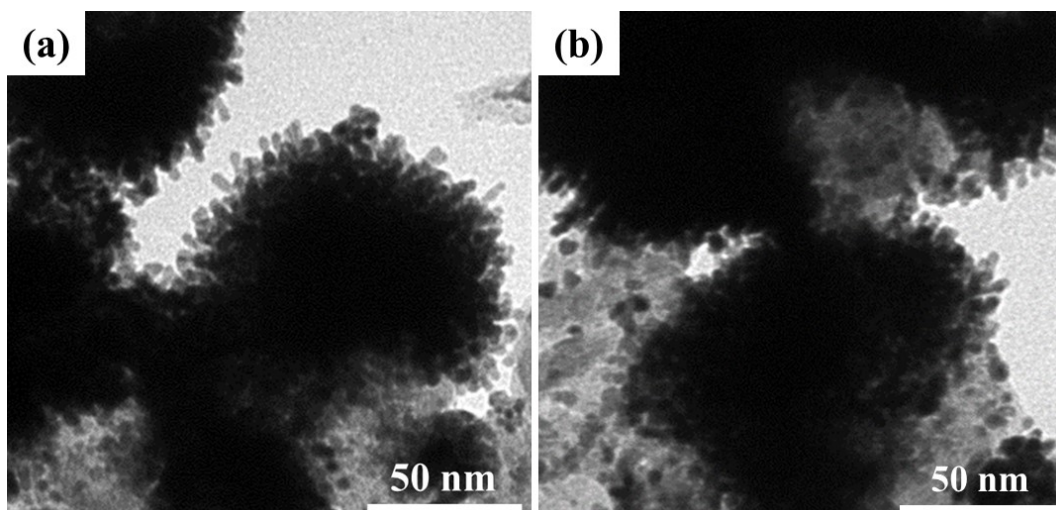

**Figure S5.** TEM images of the as-made NiPt NUCs/C catalyst (a) before and (b) after ADT.

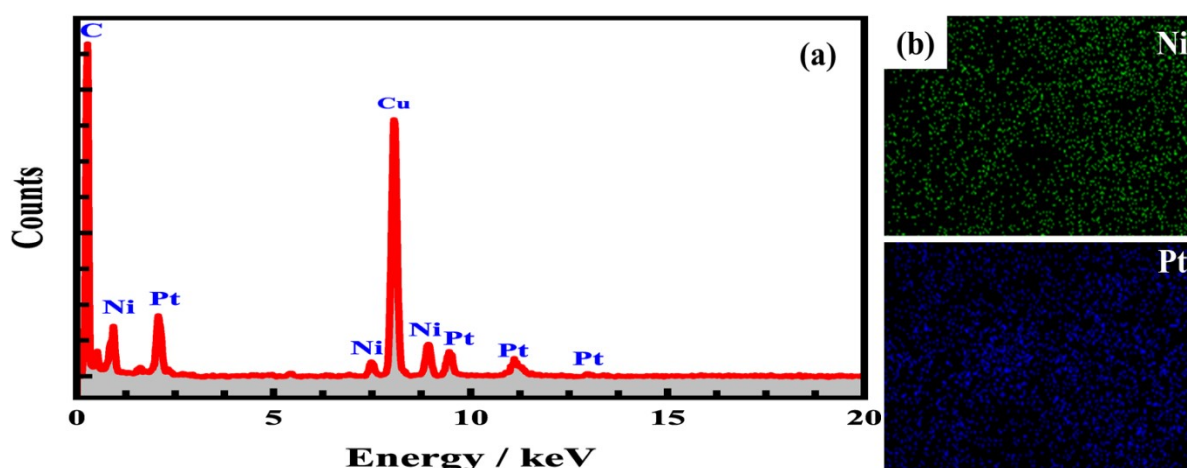

**Figure S6.** (a) EDX spectroscopy and (b) elemental mapping of Ni and Pt in the as-made NiPt NUCs/C catalyst after ADT.

**Table S1.** Summary of XRD result of NiPt NUCs/C catalyst and Pt NPs/C (E-TEK) catalyst.

| Catalysts        | $d_{(hkl)}^{(a)}$ |       |       | $D_{(hkl)}^{(b)}$ |       |       | $H_{(111)}/H_{(200)}$ | $H_{(111)}/H_{(220)}$ |
|------------------|-------------------|-------|-------|-------------------|-------|-------|-----------------------|-----------------------|
|                  | $\text{\AA}$      |       |       | nm                |       |       |                       |                       |
|                  | (111)             | (200) | (220) | (111)             | (200) | (220) |                       |                       |
| NiPt NUCs/C      | 2.20              | 1.90  | 1.40  | 3.13              | 1.94  | 2.12  | 3.00                  | 8.74                  |
| Pt NPs/C (E-TEK) | 2.30              | 2.00  | 1.40  | 2.07              | 1.96  | 2.09  | 2.44                  | 3.79                  |

<sup>(a)</sup>Calculation from Bragg's law.

<sup>(b)</sup>Calculation from Debye-Scherrer's equation.

**Table S2.** Summary of fitted XPS result of as-made NiPt NUCs/C catalyst.



| Catalyst    | Assignment       | Binding energy<br>eV | Relative intensity<br>% |
|-------------|------------------|----------------------|-------------------------|
| NiPt NUCs/C | Pt <sup>0</sup>  | 70.78                | 72.07                   |
|             |                  | 74.22                |                         |
|             | Pt <sup>2+</sup> | 72.14                | 27.93                   |
|             |                  | 76.13                |                         |
|             | Ni <sup>0</sup>  | 853.22               | 35.18                   |
|             |                  | 870.16               |                         |
|             | Ni <sup>2+</sup> | 855.88               | 64.82                   |
|             |                  | 873.55               |                         |

**Table S3.** A comparison of ORR activity of Pt-based electrocatalysts.

| Catalyst                                | Onset potential  | Half-wave potential | Mass activity at 0.9 V <sub>RHE</sub> | Specific activity at 0.9 V <sub>RHE</sub> | Refs.     |
|-----------------------------------------|------------------|---------------------|---------------------------------------|-------------------------------------------|-----------|
|                                         | V <sub>RHE</sub> | V <sub>RHE</sub>    | mA mg <sub>Metal</sub> <sup>-1</sup>  | mA cm <sup>-2</sup>                       |           |
| NiPt NUCs/C                             | 0.956            | 0.918               | 565.22                                | 1.04                                      | This work |
| Pt NPs/C (E-TEK)                        | 0.938            | 0.88                | 116.93                                | 0.16                                      | This work |
| Pd <sub>1</sub> Pt <sub>4</sub> DNSs    | 0.99             | 0.89                | 530.0                                 | 0.74                                      | 18        |
| Pt NPs/C (JM)                           | 0.956            | -                   | 67.1                                  | -                                         | 19        |
| Pt/(Mn-N)@C                             | -                | 0.928               | 541.0                                 | 0.496                                     | 20        |
| Pt <sub>3</sub> Co-700                  | -                | 0.945               | 520.0                                 | 1.10                                      | 21        |
| Pt <sub>x</sub> Y-E/C                   | -                | 0.89                | 483.0                                 | 0.59                                      | 22        |
| La-doped Pt/C-5                         | -                | -                   | 490.0                                 | 0.93                                      | 23        |
| D-PtNi/KB                               | -                | 0.89                | 460.0                                 | 1.10                                      | 24        |
| Commerical Pt/C                         | -                | 0.85                | 180.0                                 | 0.38                                      | 24        |
| Pt NPs/C                                | 0.922            | 0.811               | 120.0                                 | 0.15                                      | 25        |
| Pt-Ni NW <sub>Ar</sub> /C               | -                | -                   | 150.0                                 | 0.45                                      | 26        |
| Pt <sub>1</sub> Co <sub>1</sub> -IMC@Pt | -                | -                   | 530.0                                 | 1.11                                      | 27        |
| Pt <sub>3</sub> Mn intermetallic/C      | -                | -                   | 386.0                                 | 0.877                                     | 28        |
| 10% Pt/Co-N-C                           | -                | 0.886               | 223.0                                 | -                                         | 29        |
| PtP <sub>1.4</sub> @Pt/C                | -                | 0.888               | 310.0                                 | 0.62                                      | 30        |

**Table S4.** A summary of ORR performance of electrocatalysts before and after the ADT test.

| Catalyst         | Oxygen electro-reduction reaction |         |                                    |        |                 |
|------------------|-----------------------------------|---------|------------------------------------|--------|-----------------|
|                  | Half-wave potential               |         | Mass activity                      |        | Deterioration % |
|                  | $V_{\text{RHE}}$                  |         | $\text{mA mg}_{\text{Metal}}^{-1}$ |        |                 |
| Initial          | After ADT                         | Initial | After ADT                          |        |                 |
| NiPt NUCs/C      | 0.918                             | 0.908   | 565.22                             | 478.74 | 15.29           |
| Pt NPs/C (E-TEK) | 0.876                             | 0.851   | 116.93                             | 62.57  | 46.48           |

## References

1. Bhuvanendran, N.; Ravichandran, S.; Zhang, W.; Ma, Q.; Xu, Q.; Khotseng, L.; Su, H., Highly efficient methanol oxidation on durable Pt<sub>x</sub>Ir/MWCNT catalysts for direct methanol fuel cell applications. *International Journal of Hydrogen Energy* **2020**, *45* (11), 6447-6460.
2. Vargas-Ordaz, M.; Velázquez-Hernández, I.; Bañuelos, J. A.; Ledesma-García, J.; Álvarez-Contreras, L.; Arjona, N.; Guerra-Balcázar, M., Synthesis of PtAg bimetallic material as a multi-fuel tolerant electrocatalyst and spectroelectrochemical analysis of its capability to perform the oxygen reduction. *Materials Today Energy* **2019**, *14*, 100335.
3. Huang, T.-H.; Bhalothia, D.; Dai, S.; Yan, C.; Wang, K.-W.; Chen, T.-Y., Bifunctional Pt–SnO<sub>x</sub> nanorods for enhanced oxygen reduction and hydrogen evolution reactions. *Sustainable Energy & Fuels* **2021**, *5* (11), 2960-2971.
4. Bhalothia, D.; Fan, Y.-J.; Lai, Y.-C.; Yang, Y.-T.; Yang, Y.-W.; Lee, C.-H.; Chen, T.-Y., Conformational Effects of Pt-Shells on Nanostructures and Corresponding Oxygen Reduction Reaction Activity of Au-Cluster-Decorated NiO<sub>x</sub>@Pt Nanocatalysts. *Nanomaterials* **2019**, *9* (7).
5. Zhang, C.; Zhang, Y.; Xiao, H.; Zhang, J.; Li, L.; Wang, L.; Bai, Q.; Liu, M.; Wang, Z.; Sui, N., Superior catalytic performance and CO tolerance of PtCu/graphdiyne electrocatalyst toward methanol oxidation reaction. *Colloids and Surfaces A: Physicochemical and Engineering Aspects* **2021**, *612*, 125960.
6. Huang, X.; Chen, Y.; Zhu, E.; Xu, Y.; Duan, X.; Huang, Y., Monodisperse Cu@PtCu nanocrystals and their conversion into hollow-PtCu nanostructures for methanol oxidation. *Journal of Materials Chemistry A* **2013**, *1* (46), 14449-14454.
7. Zhang, G.; Yang, Z.; Zhang, W.; Hu, H.; Wang, C.; Huang, C.; Wang, Y., Tailoring the morphology of Pt<sub>3</sub>Cu<sub>1</sub> nanocrystals supported on graphene nanoplates for ethanol oxidation.

*Nanoscale* **2016**, *8* (5), 3075-3084.

8. He, Y.; Chen, W.; Li, X.; Zhang, Z.; Fu, J.; Zhao, C.; Xie, E., Freestanding Three-Dimensional Graphene/MnO<sub>2</sub> Composite Networks As Ultralight and Flexible Supercapacitor Electrodes. *ACS Nano* **2013**, *7* (1), 174-182.

9. Li, N.; Tang, S.; Pan, Y.; Meng, X., One-step and rapid synthesis of reduced graphene oxide supported Pt nanodendrites by a microwave-assisted simultaneous reduction. *Materials Research Bulletin* **2014**, *49*, 119-125.

10. Sahoo, L.; Mondal, S.; Gloskovskii, A.; Chutia, A.; Gautam, U. K., Unravelling charge-transfer in Pd to pyrrolic-N bond for superior electrocatalytic performance. *Journal of Materials Chemistry A* **2021**, *9* (17), 10966-10978.

11. Ometto, F. B.; Carbonio, E. A.; Teixeira-Neto, É.; Villullas, H. M., Changes induced by transition metal oxides in Pt nanoparticles unveil the effects of electronic properties on oxygen reduction activity. *Journal of Materials Chemistry A* **2019**, *7* (5), 2075-2086.

12. Ravichandran, S.; Bhuvanendran, N.; Xu, Q.; Maiyalagan, T.; Xing, L.; Su, H., Ordered mesoporous Pt-Ru-Ir nanostructures as superior bifunctional electrocatalyst for oxygen reduction/oxygen evolution reactions. *Journal of Colloid and Interface Science* **2022**, *608*, 207.

13. Da Silva, G. C.; Fernandes, M. R.; Ticianelli, E. A., Activity and Stability of Pt/IrO<sub>2</sub> Bifunctional Materials as Catalysts for the Oxygen Evolution/Reduction Reactions. *ACS Catalysis* **2018**, *8* (3), 2081-2092.

14. Tian, G.-L.; Zhao, M.-Q.; Yu, D.; Kong, X.-Y.; Huang, J.-Q.; Zhang, Q.; Wei, F., Nitrogen-Doped Graphene/Carbon Nanotube Hybrids: In Situ Formation on Bifunctional Catalysts and Their Superior Electrocatalytic Activity for Oxygen Evolution/Reduction Reaction. *Small* **2014**, *10* (11), 2251-2259.

15. Lu, Y.; Wen, X.; Chen, X.; Chu, P. K.; Tang, T.; Mijowska, E., Nitrogen-doped porous carbon embedded with cobalt nanoparticles for excellent oxygen reduction reaction. *Journal of Colloid and Interface Science* **2019**, *546*, 344-350.

16. Huang, Y.; Tan, Z.; Wu, H.; Feng, C.; Ding, Y., Fe@Pt core-shell nanoparticles as electrocatalyst for oxygen reduction reaction in acidic media. *Ionics* **2018**, *24* (1), 229-236.

17. Zhang, C.; Ma, B.; Zhou, Y.; Wang, C., Highly active and durable Pt/MXene nanocatalysts for ORR in both alkaline and acidic conditions. *Journal of Electroanalytical Chemistry* **2020**, *865*, 114142.

18. Peng, X.; Lu, D.; Qin, Y.; Li, M.; Guo, Y.; Guo, S., Pt-on-Pd Dendritic Nanosheets with Enhanced Bifunctional Fuel Cell Catalytic Performance. *ACS Applied Materials &*

*Interfaces* **2020**, *12* (27), 30336-30342.

19. Dai, S.; Chou, J.-P.; Wang, K.-W.; Hsu, Y.-Y.; Hu, A.; Pan, X.; Chen, T.-Y., Platinum-trimer decorated cobalt-palladium core-shell nanocatalyst with promising performance for oxygen reduction reaction. *Nature Communications* **2019**, *10* (1), 440.
20. Shu, Q.; Zhang, J.; Hu, B.; Deng, X.; Yuan, J.; Ran, R.; Zhou, W.; Shao, Z., Rational Design of a High-Durability Pt-Based ORR Catalyst Supported on Mn/N Codoped Carbon Sheets for PEMFCs. *Energy & Fuels* **2022**, *36* (3), 1707-1715.
21. Wang, D.; Xin, H. L.; Hovden, R.; Wang, H.; Yu, Y.; Muller, D. A.; DiSalvo, F. J.; Abruña, H. D., Structurally ordered intermetallic platinum-cobalt core-shell nanoparticles with enhanced activity and stability as oxygen reduction electrocatalysts. *Nature Materials* **2013**, *12* (1), 81-87.
22. Brandiele, R.; Guadagnini, A.; Girardi, L.; Dražić, G.; Dalconi, M. C.; Rizzi, G. A.; Amendola, V.; Durante, C., Climbing the oxygen reduction reaction volcano plot with laser ablation synthesis of Pt<sub>x</sub>Y nanoalloys. *Catalysis Science & Technology* **2020**, *10* (14), 4503.
23. Kim, J.; Kabiraz, M. K.; Lee, W.; Hwang, G. H.; Choi, S.-I., Solvothermal Doping of Lanthanum on Nanoscale Platinum Surfaces to Improve Oxygen Electroreduction Performance. *ChemElectroChem* **2020**, *7* (12), 2643-2650.
24. Zhao, X.; Xi, C.; Zhang, R.; Song, L.; Wang, C.; Spendelov, J. S.; Frenkel, A. I.; Yang, J.; Xin, H. L.; Sasaki, K., High-Performance Nitrogen-Doped Intermetallic PtNi Catalyst for the Oxygen Reduction Reaction. *ACS Catalysis* **2020**, *10* (18), 10637-10645.
25. Fu, S.; Zhu, C.; Song, J.; Engelhard, M. H.; Xia, H.; Du, D.; Lin, Y., Kinetically Controlled Synthesis of Pt-Based One-Dimensional Hierarchically Porous Nanostructures with Large Mesopores as Highly Efficient ORR Catalysts. *ACS Applied Materials & Interfaces* **2016**, *8* (51), 35213-35218.
26. Kato, M.; Iguchi, Y.; Li, T.; Kato, Y.; Zhuang, Y.; Higashi, K.; Uruga, T.; Saida, T.; Miyabayashi, K.; Yagi, I., Structural Transformation of Pt-Ni Nanowires as Oxygen Reduction Electrocatalysts to Branched Nanostructures during Potential Cycles. *ACS Catalysis* **2022**, *12* (1), 259-264.
27. Cheng, Q.; Yang, S.; Fu, C.; Zou, L.; Zou, Z.; Jiang, Z.; Zhang, J.; Yang, H., High-loaded sub-6 nm Pt<sub>1</sub>Co<sub>1</sub> intermetallic compounds with highly efficient performance expression in PEMFCs. *Energy & Environmental Science* **2022**, *15* (1), 278-286.
28. Lim, J.; Jung, C.; Hong, D.; Bak, J.; Shin, J.; Kim, M.; Song, D.; Lee, C.; Lim, J.; Lee, H.; Lee, H. M.; Cho, E., Atomically ordered Pt<sub>3</sub>Mn intermetallic electrocatalysts for the oxygen reduction reaction in fuel cells. *Journal of Materials Chemistry A* **2022**, *10* (13),

7399.

29. Guo, P.; Liu, B.; Dai, Y.-K.; Gong, X.-F.; Xia, Y.-F.; Zhang, Y.-L.; Liu, B.; Zhao, L.; Sui, X.-L.; Wang, Z.-B., Coupling fine Pt nanoparticles and Co-N<sub>x</sub> moiety as a synergistic bi-active site catalyst for oxygen reduction reaction in acid media. *Journal of Colloid and Interface Science* **2022**, *613*, 276-284.

30. Li, W.-Z.; Lu, B.-A.; Gan, L.; Tian, N.; Zhang, P.-Y.; Yan, W.; Chen, W.-X.; Chen, Y.-H.; Zhou, Z.-Y.; Sun, S.-G., High activity and durability of carbon-supported core-shell PtP<sub>x</sub>@Pt/C catalyst for oxygen reduction reaction. *Chinese Journal of Catalysis* **2021**, *42* (12), 2173-2180.
